# Supplementary material
Source: PubMed Central journal article supplement (PMC6132241)
Supplement: NIHMS971907-supplement-Supp_figS1-11.pdf [file NIHMS971907-supplement-Supp_figS1-11.pdf]

**Fig S1**

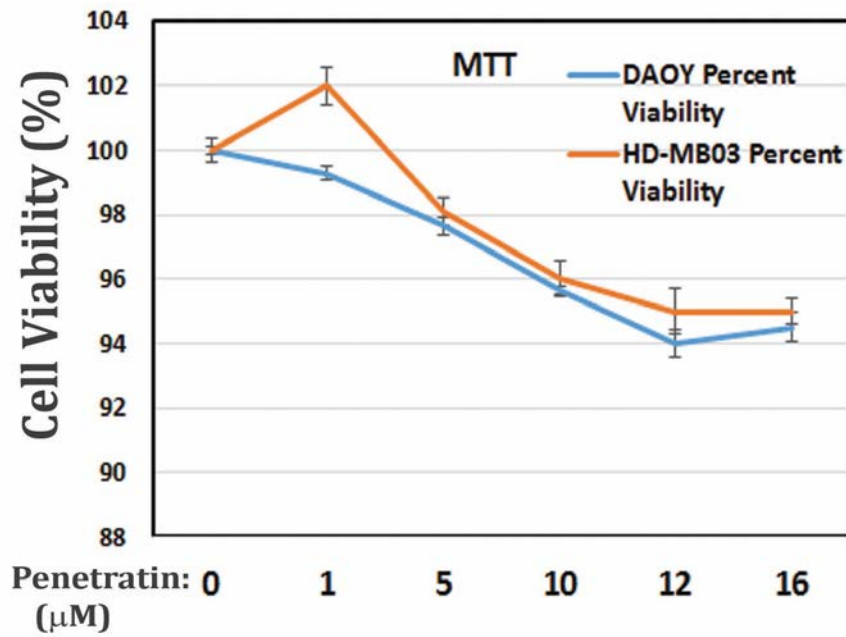

**Fig S1:** Penetratin has minimal effect on MB cell viability. MB cell line, DAOY and HD-MB03 were treated with penetratin control peptide at different doses and cell viability was measured by MTT assay as described in materials and methods.

**Fig S2**

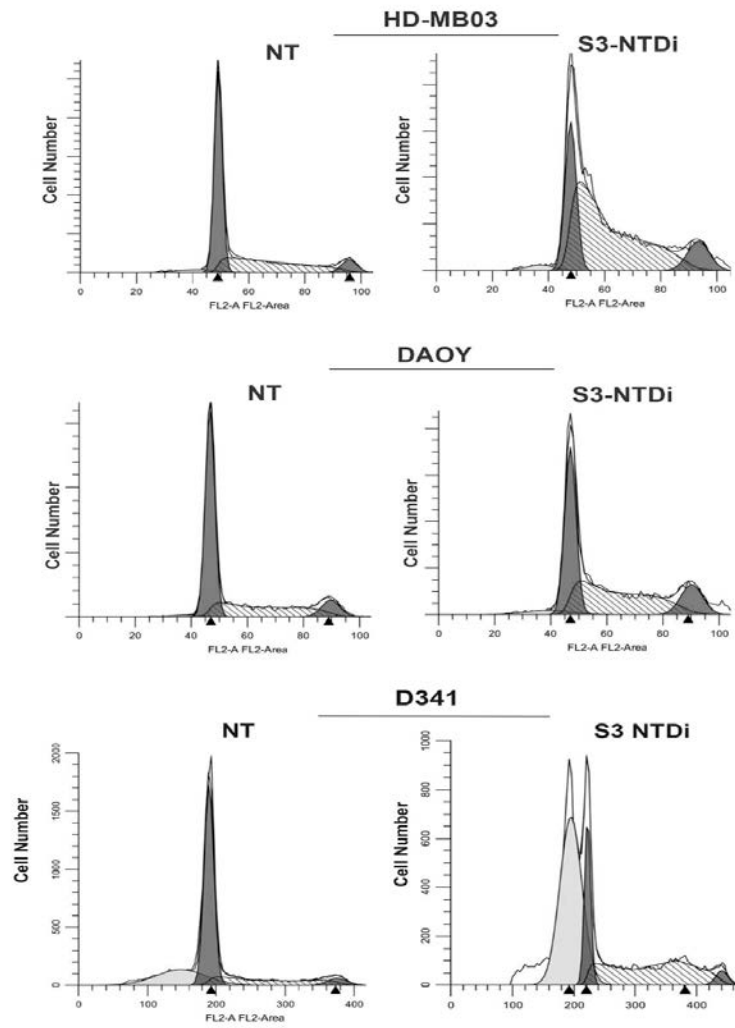

**Fig S2:** Effect of S3-NTDi (10  $\mu$ M) on HD-MB03, DAOY and D341 cell cycle as described in Materials and Methods. NT: non-treated control.

**Fig S3**

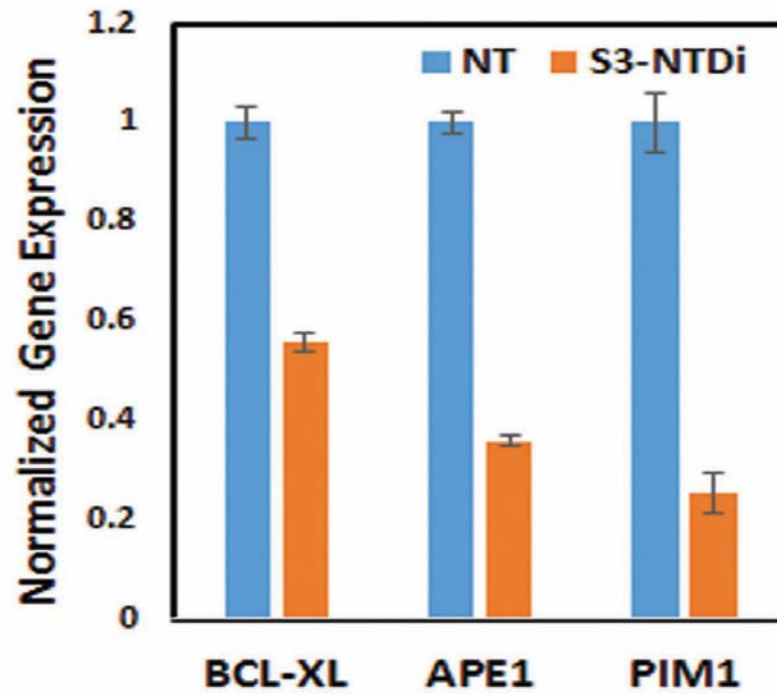

**Fig S3:** HD-MB03 cells were treated with S3-NTDi (10  $\mu$ M) for 24h. Cells were stimulated with IL-6/sIL-6 $\alpha$  for 20 mins prior to harvest. Total RNA was subjected to qRT-PCR for STAT3 target gene expression as described in Materials and Methods. NT: non-treated control.

**Fig S4**

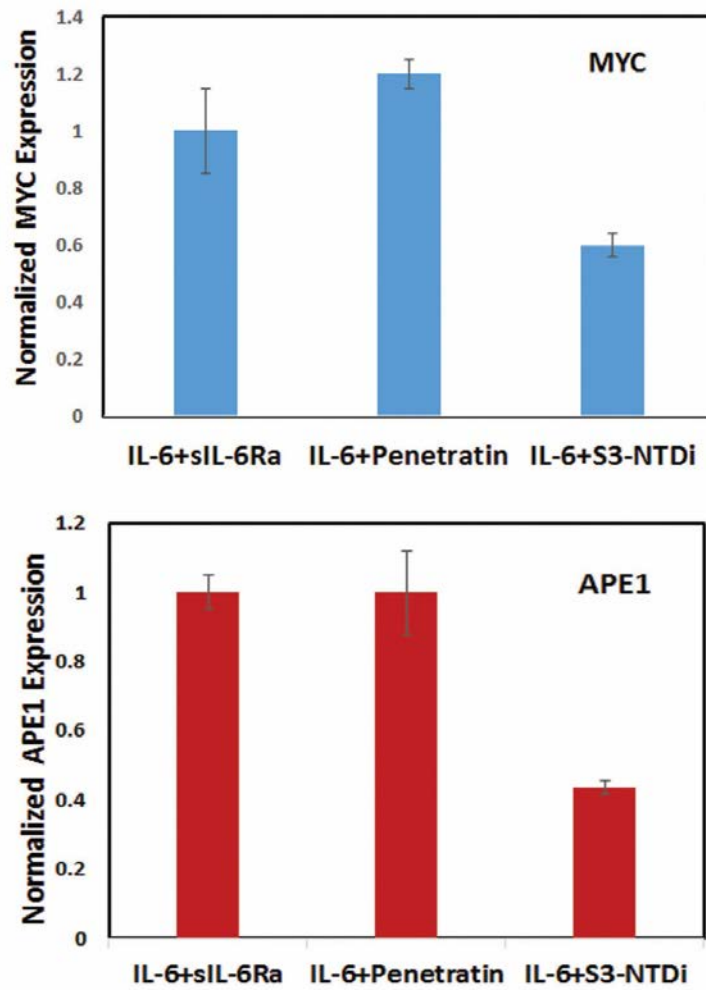

**Fig S4:** Effect of penetratin on gene expression. HD-MB03 cells were either untreated or treated with penetratin control peptide (10  $\mu$ M) or S3-NTDi (10 $\mu$ M). Cells were stimulated with IL-6/sIL-6 $\alpha$  for 20 mins prior to harvest. Total RNA was subjected to qRT-PCR for MYC and APE1 expression.

**Fig S5**

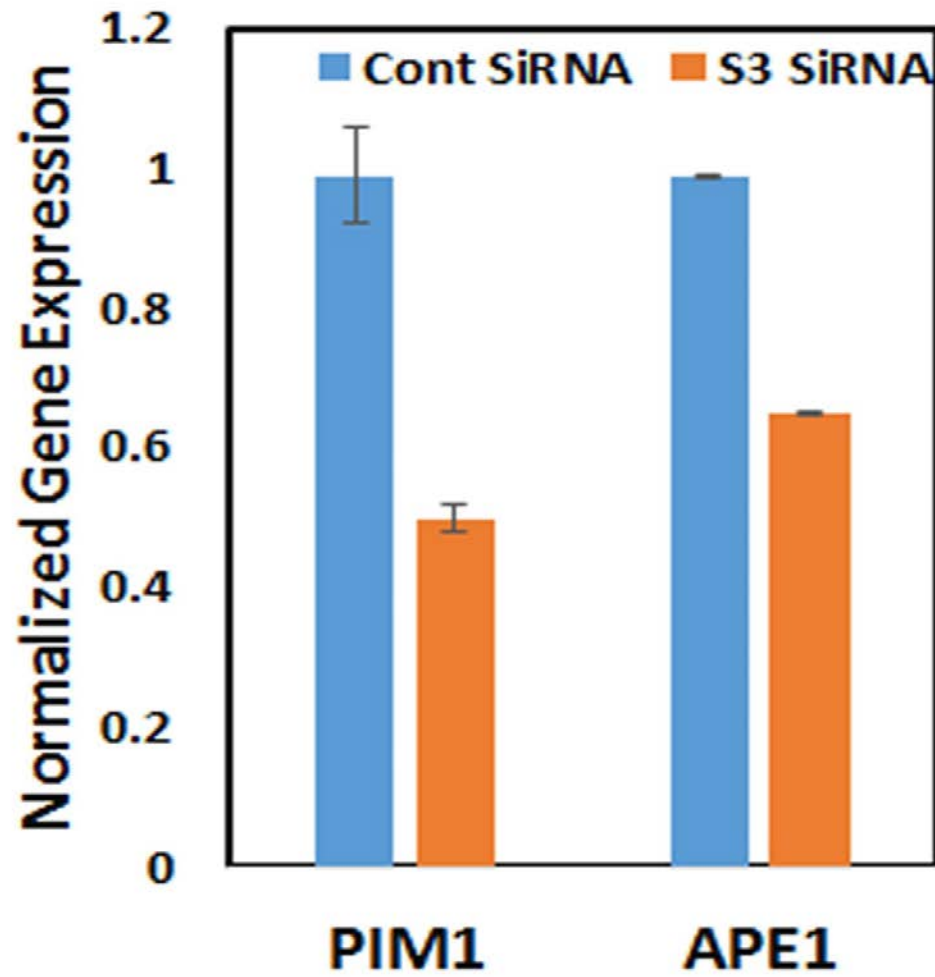

**Fig S5:** HD-MB03 cells were either treated with control siRNA or S3-siRNA as described in materials and methods. Cells were stimulated with IL-6/sIL-6 $\alpha$  for 20 mins prior to harvest. Total RNA was subjected to qRT-PCR for STAT3 regulated gene expression.

**Fig S6**

**DAOY-sphere + S3-NTDi**

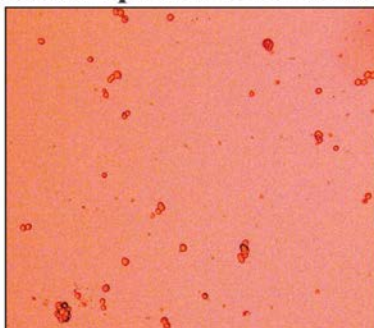

**HD-MB03 sphere +S3-NTDi**

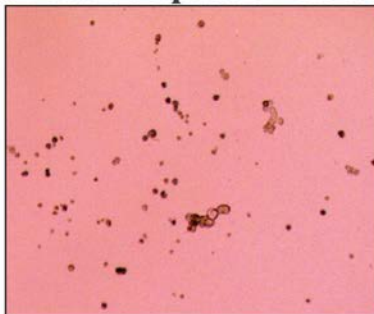

**Fig. S6:** DAOY and HD-MB03 spheres were treated with S3-NTDi (10  $\mu$ M) for 24 h and the resulting spheres were imaged as described in Materials and Methods.

**Fig S7**

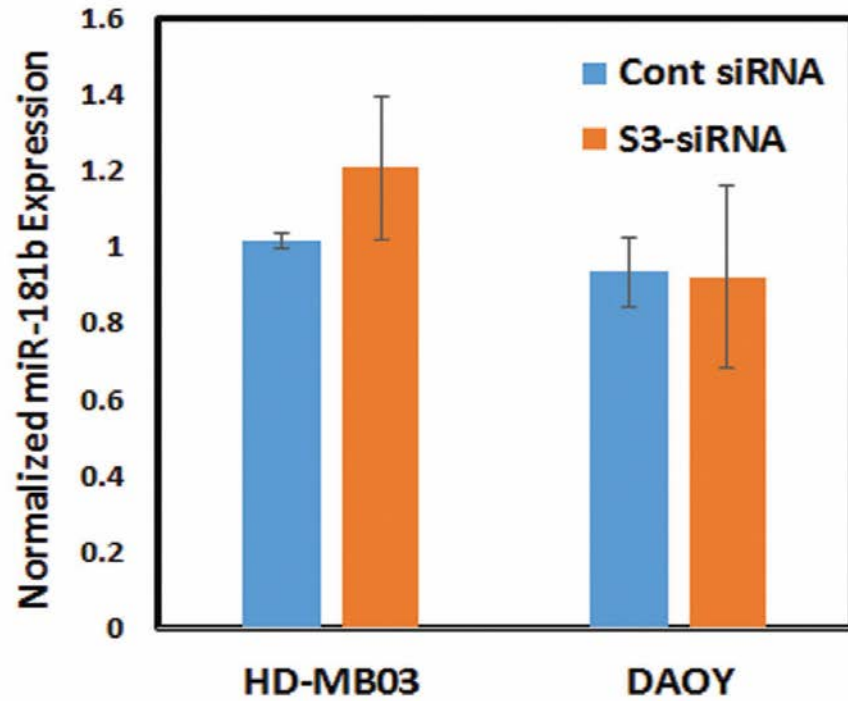

**Fig S7:** HD-MB03 and DAOY cells were either treated with control siRNA or S3-siRNA as described in materials and methods. Cells were stimulated with IL-6/sIL-6 $\alpha$  for 20 mins prior to harvesting miRNAs. miR-181b expression was determined by qRT-PCR.

**Fig S8**

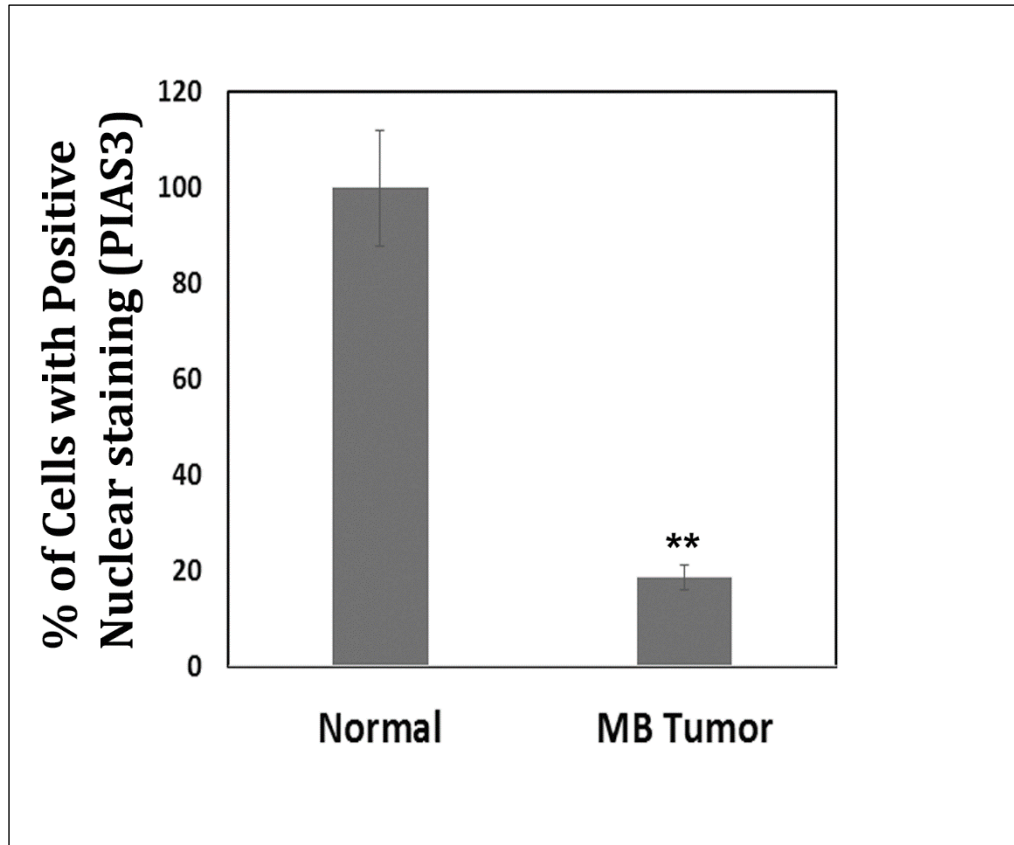

**Fig S8:** MB TMA were stained with PIAS3 Ab and positive nuclear staining were counted in normal cerebellar tissues and MB tumors using Image J software. Above diagram shows approximately 20-25% of the tumor tissues express PIAS3. \* represents  $p < 0.001$ .

**Fig S9**

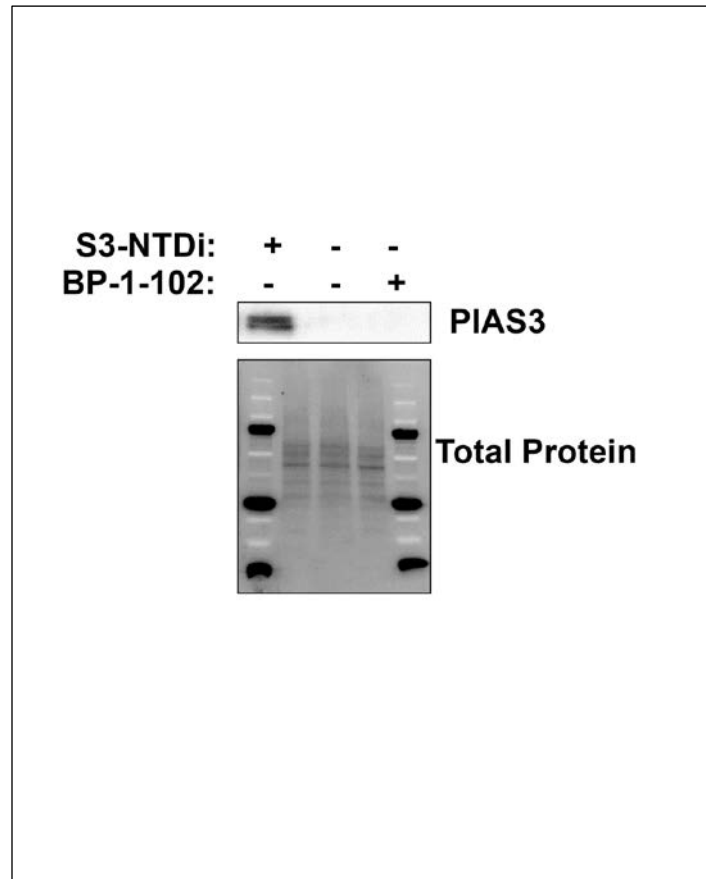

**Fig S9:** HD-MB03 cells were treated either with 10 $\mu$ M S3-NTDi (lane 1) or left untreated (lane 2) or with STAT3 inhibitor 2 $\mu$ M BP-1-102 (lane 3) for 36 h. IL-6 stimulated WCE were fractionated in SDS-PAGE and Western immunoblot was performed using PIAS3 Ab. Bottom gel image shows equivalent total protein loading in three lanes.

**Fig S10**

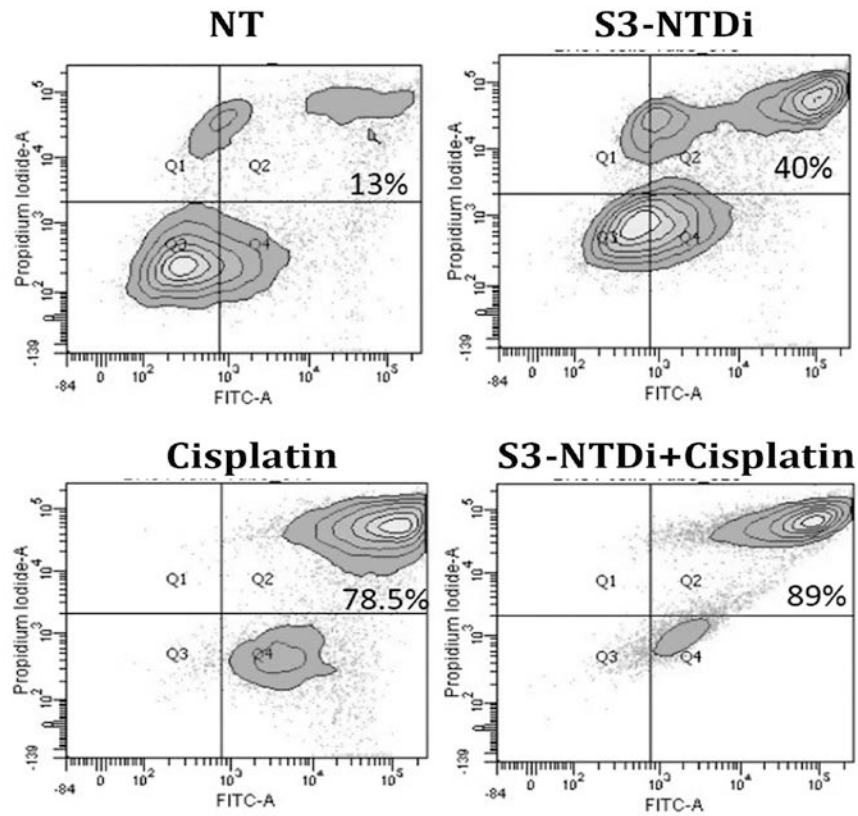

**Fig S10:** Effect of combination of S3-NTDi and cisplatin on MB cell apoptosis. Representative scatter diagram for the apoptotic cell analyses in DAOY following treatment of either S3-NTDi (12 $\mu$ M) or cisplatin (2.5 $\mu$ M) alone or in combination for 24h.

**Fig S11**

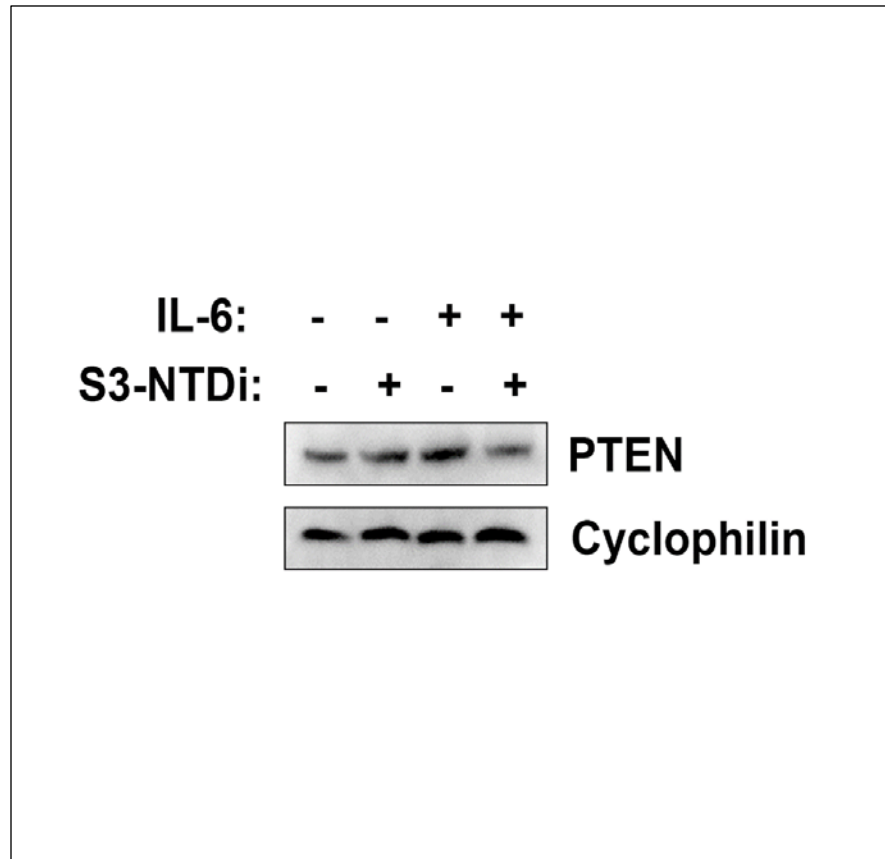

**Fig S11:** HD-MB03 cells were treated either with S3-NTDi (10 $\mu$ M) or left untreated. After 24h cells were either treated with IL-6 for 20 mins or left untreated. WCE were fractionated in SDS-PAGE and Western immunoblot was performed using PTEN Ab.
